# Supplementary material for: Quantitative evaluation of explainable graph neural networks for molecular property prediction
Source: PubMed Central journal article supplement — Patterns (N Y). 2022 Nov 10;3(12):100628. doi: 10.1016/j.patter.2022.100628 (PMC9782255; doi:10.1016/j.patter.2022.100628), 2022-11-10
Supplement: mmc1.pdf [file mmc1.pdf]

**Patterns, Volume 3**

**Supplemental information**

**Quantitative evaluation of explainable graph  
neural networks for molecular property prediction**

**Jiahua Rao, Shuangjia Zheng, Yutong Lu, and Yuedong Yang**

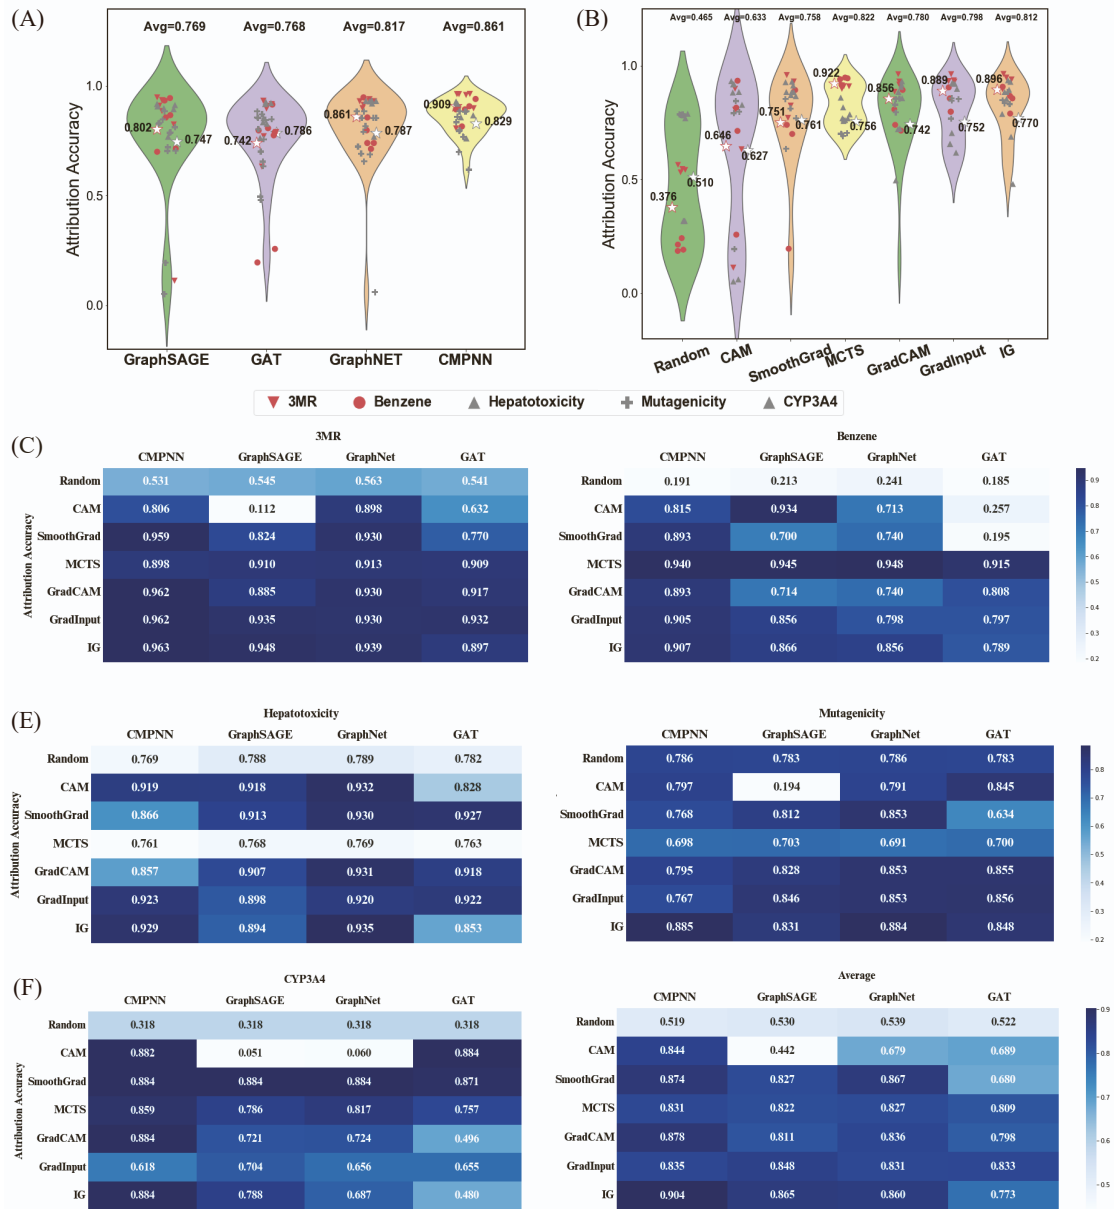

**Figure S1. The average Attribution-Accuracy values.** (A) four GNN models and (B) six XAI methods. (C-F) Detailed Attribution Accuracies for combinations of all XAI methods and GNN models for each dataset.

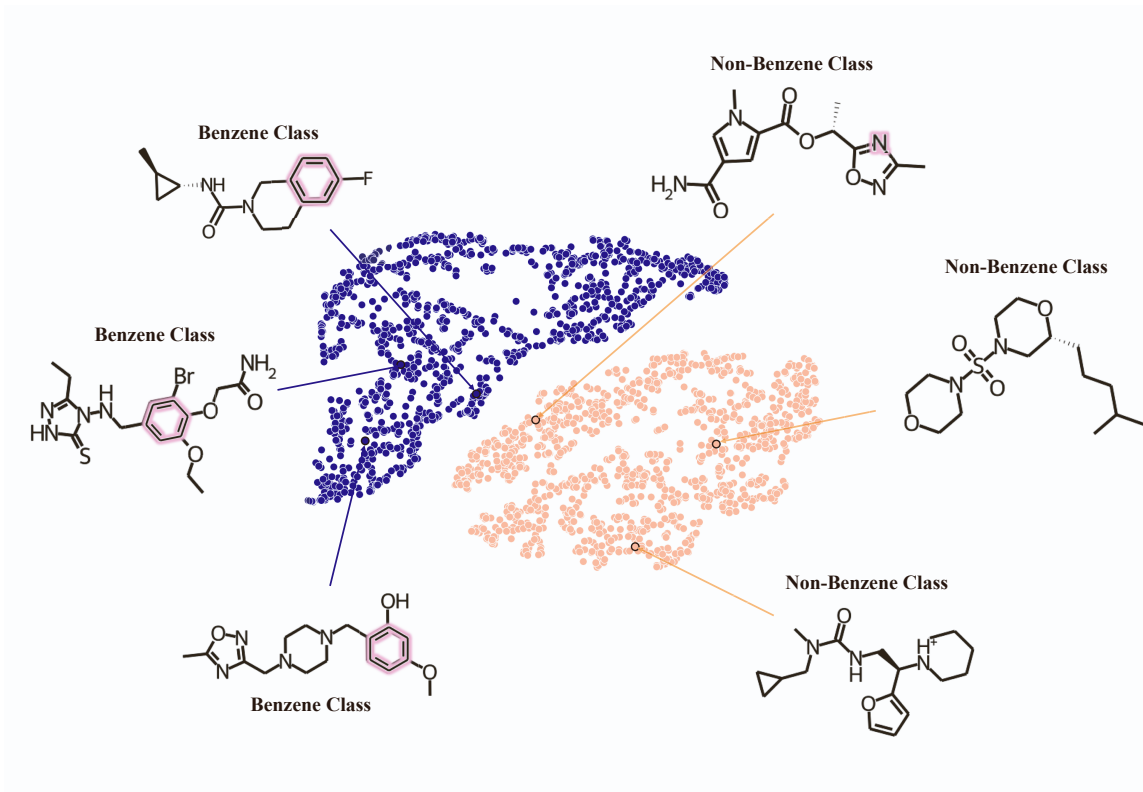

**Figure S2. Visualization of Benzene dataset.** The embeddings learned by CMPNN+IG over the Benzene dataset shown by t-SNE, together with representively 3 benzene and 3 non-benzene molecules.

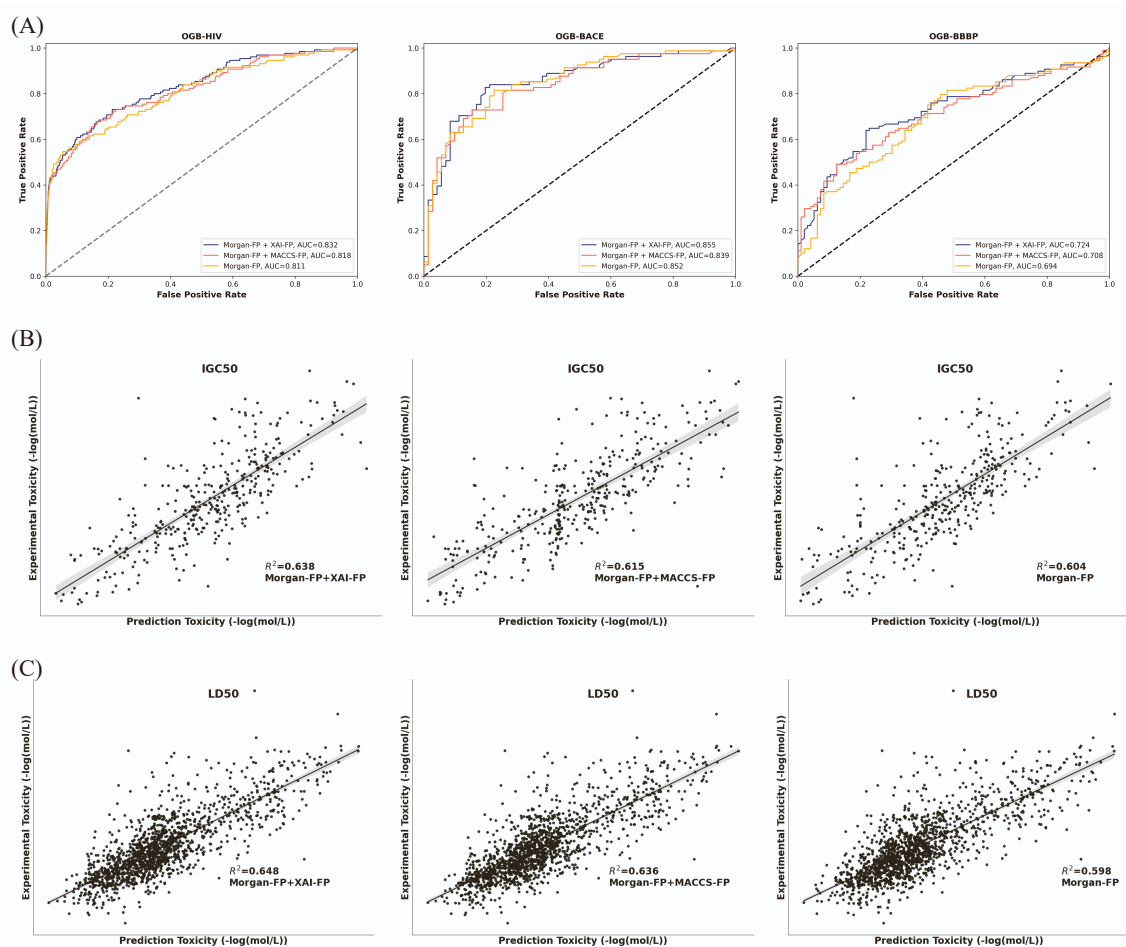

**Figure S3. Results of XAI-assisted FPs experiments with Random Forest.** (A) The ROC curves of Morgan-FP, Morgan-FP + MACCS-FP, and Morgan-FP + XAI-FP with Random Forest on the OGB-HIV, OGB-BACE and OGB-BBBP dataset. (B) The predicted results of Morgan-FP + XAI-FPs, Morgan-FP + MACCS-FP and Morgan-FP with Random Forest model for the IGC50 dataset. (C) The predicted results of Morgan-FP + XAI-FPs, Morgan-FP + MACCS-FP and Morgan-FP with Random Forest model for the LD50 dataset.

**Table S1.** Predictive Performance comparison of baseline methods (from previous literature) with our GNN models on FreeSolv, Lipophilicity, ESOL, ClinTox, BBBP benchmarks.

| Datasets  | FreeSolv                 | Lipophilicity            | ESOL                     | ClinTox            | BBBP               |
|-----------|--------------------------|--------------------------|--------------------------|--------------------|--------------------|
| Methods   | $R^2$                    | $R^2$                    | $R^2$                    | AUROC              | AUROC              |
| ECFP4     | 0.640 <sup>a</sup>       | 0.577 <sup>a</sup>       | 0.778 <sup>a</sup>       | 0.640 <sup>a</sup> | 0.955 <sup>a</sup> |
| AGBT-FP   | <u>0.935<sup>b</sup></u> | <u>0.776<sup>b</sup></u> | -                        | 0.935 <sup>b</sup> | 0.763 <sup>b</sup> |
| MPNN      | 0.923 <sup>a</sup>       | 0.697 <sup>a</sup>       | <b>0.939<sup>a</sup></b> | 0.923 <sup>a</sup> | 0.960 <sup>a</sup> |
| SSL-FP    | 0.678 <sup>c</sup>       | 0.740 <sup>c</sup>       | 0.925 <sup>c</sup>       | 0.688 <sup>c</sup> | 0.953 <sup>c</sup> |
| GraphSAGE | 0.922                    | 0.688                    | 0.929                    | 0.933              | <u>0.962</u>       |
| GAT       | 0.919                    | 0.685                    | 0.924                    | 0.889              | 0.959              |
| GraphNET  | <b>0.941</b>             | 0.798                    | 0.919                    | <u>0.938</u>       | 0.961              |
| CMPNN     | 0.933                    | <b>0.823</b>             | <u>0.932</u>             | <b>0.941</b>       | <b>0.963</b>       |

<sup>a</sup>The prediction results are derived from Wu et al<sup>[1]</sup>.

<sup>b</sup>The prediction results are derived from Chen et al<sup>[2]</sup>.

<sup>c</sup>The prediction results are derived from Chen et al<sup>[3]</sup>.

**Table S2.** Predictive Performance comparison of baseline methods (from previous literature) with our GNN models on LD50, IGC50, LC50, LC50DM, LogP datasets.

| Datasets    | LD50               | IGC50                    | LC50                     | LC50DM                   | LogP               |
|-------------|--------------------|--------------------------|--------------------------|--------------------------|--------------------|
| Methods     | $R^2$              | $R^2$                    | $R^2$                    | $R^2$                    | $R^2$              |
| ECFP4       | 0.586 <sup>a</sup> | 0.647 <sup>a</sup>       | 0.573 <sup>a</sup>       | 0.452 <sup>a</sup>       | 0.857 <sup>a</sup> |
| MACCS       | 0.643 <sup>a</sup> | 0.643 <sup>a</sup>       | 0.608 <sup>a</sup>       | 0.434 <sup>a</sup>       | 0.867 <sup>a</sup> |
| HybridModel | 0.629 <sup>a</sup> | 0.810 <sup>a</sup>       | 0.678 <sup>a</sup>       | 0.616 <sup>a</sup>       | 0.893 <sup>a</sup> |
| AGBT-FP     | 0.671 <sup>a</sup> | <b>0.842<sup>a</sup></b> | <u>0.783<sup>a</sup></u> | <b>0.830<sup>a</sup></b> | 0.905 <sup>a</sup> |
| GraphSAGE   | 0.654              | 0.778                    | 0.731                    | 0.724                    | 0.904              |
| GAT         | 0.662              | 0.809                    | 0.742                    | 0.798                    | 0.899              |
| GraphNET    | <b>0.683</b>       | 0.834                    | <b>0.793</b>             | 0.810                    | <u>0.923</u>       |
| CMPNN       | <u>0.679</u>       | <u>0.841</u>             | 0.776                    | <u>0.813</u>             | <b>0.939</b>       |

<sup>a</sup>The prediction results are derived from Chen et al<sup>[2]</sup>.

**Table S3.** Explainability Performance comparison of baseline methods (RF and XGBoost) with GNN models (explained by IG).

| Datasets                 | 3MR             | Benzene      | Hepatotoxicity | Mutagenicity |
|--------------------------|-----------------|--------------|----------------|--------------|
| Methods                  | Attribution-ACC |              |                |              |
| RF + Feature Importances | 0.516           | 0.621        | 0.523          | 0.607        |
| XGBoost + SHAP Values    | 0.678           | 0.740        | 0.701          | 0.688        |
| GraphSAGE + IG           | <u>0.948</u>    | <u>0.866</u> | 0.894          | 0.831        |
| GAT + IG                 | 0.897           | 0.789        | 0.853          | 0.848        |
| GraphNET + IG            | 0.939           | 0.856        | <b>0.935</b>   | <u>0.884</u> |
| CMPNN + IG               | <b>0.963</b>    | <b>0.907</b> | <u>0.929</u>   | <b>0.885</b> |

**Table S4.** The predicted substructures by representative combinations of GNN models and XAI methods.

| Ground-truth | CMPNN+IG  | GraphNET+IG      | GraphSAGE+IG  | GAT+IG          |
|--------------|-----------|------------------|---------------|-----------------|
|              |           |                  |               |                 |
|              |           |                  |               |                 |
|              |           |                  |               |                 |
|              |           |                  |               |                 |
|              |           |                  |               |                 |
| CMPNN+Random | CMPNN+CAM | CMPNN+SmoothGrad | CMPNN+GradCAM | CMPNN+GradInput |
|              |           |                  |               |                 |
|              |           |                  |               |                 |
|              |           |                  |               |                 |
|              |           |                  |               |                 |

**Table S5.** The Performance comparison of XAI method and medicinal chemists.

|        | Prediction Performance |              | Explanation Performance |                       |
|--------|------------------------|--------------|-------------------------|-----------------------|
|        | Accuracy               | Precision    | Attribution-ACC         | Attribution-Precision |
| Random | -                      | -            | 0.568                   | 0.123                 |
| XAI    | <b>0.92</b>            | <u>0.800</u> | <u>0.839</u>            | <u>0.431</u>          |
| MC1    | <u>0.68</u>            | <b>0.842</b> | 0.820                   | 0.352                 |
| MC2    | 0.60                   | 0.596        | <b>0.852</b>            | <b>0.471</b>          |
| MC3    | 0.62                   | 0.667        | 0.801                   | 0.232                 |
| MC4    | 0.50                   | 0.559        | 0.804                   | 0.180                 |
| MC5    | 0.58                   | 0.595        | 0.794                   | 0.294                 |
| MC6    | 0.54                   | 0.594        | 0.759                   | 0.197                 |
| MC7    | 0.62                   | 0.656        | 0.804                   | 0.220                 |

**Table S6.** Statistics of XAI-Benchmarks.

| Benchmark               | Task           | Dataset Name   | Compounds | Substructure             |
|-------------------------|----------------|----------------|-----------|--------------------------|
| Synthetic Benchmarks    | Classification | 3MR            | 3152      | Three-membered ring      |
|                         | Classification | Benzene        | 12000     | Benzene ring             |
| Experimental Benchmarks | Classification | Mutagenicity   | 6506      | Mutagenicity alerts      |
|                         | Classification | Hepatotoxicity | 587       | Hepatotoxic alerts       |
|                         | Classification | CYP450         | 9122      | Substructure differences |

**Table S7.** Atom features and Bond features.

| Features      | Description                                                                                  | Size |
|---------------|----------------------------------------------------------------------------------------------|------|
| <b>Atom</b>   |                                                                                              |      |
| Atom type     | Type of atom (ex.C,N,O), by atomic number.                                                   | 100  |
| # Bonds       | Number of bonds the atom is involved in.                                                     | 6    |
| Formal charge | Integer electronic charge assigned to atom.                                                  | 5    |
| Chirality     | Unspecified, tetrahedral CW/CCW, or other.                                                   | 4    |
| # Hs          | Number of bonded Hydrogen atom.                                                              | 5    |
| Hybridization | sp, sp <sup>2</sup> , sp <sup>3</sup> , sp <sup>3</sup> d, or sp <sup>3</sup> d <sup>2</sup> | 5    |
| Aromaticity   | Whether this atom is part of an aromatic system.                                             | 1    |
| Atomic mass   | Mass of the atom, divided by 100.                                                            | 1    |
| <b>Bond</b>   |                                                                                              |      |
| Bond type     | Single, double, triple, or aromatic.                                                         | 4    |
| Conjugated    | Whether the bond is conjugated.                                                              | 1    |
| In ring       | Whether the bond is part of a ring.                                                          | 1    |
| Stereo        | None, any, E/Z or cis/trans.                                                                 | 6    |



**Table S8.** Hyperparameter ranges for four types of GNN models.

| Model        | Hyperparameters             | Range                 |
|--------------|-----------------------------|-----------------------|
| GraphSAGE    | Batch size                  | {32, 64}              |
|              | Learning rate               | {0.0001, 0.001, 0.01} |
|              | Embedding size              | {32, 64, 128}         |
|              | Num of layer                | {3, 5}                |
|              | Aggregation type            | {Add, Mean, Max}      |
|              | Num of epoch                | {50, 100, 300}        |
| GAT          | Batch size                  | {50, 64}              |
|              | Learning rate               | {0.0001, 0.001, 0.01} |
|              | L2 regularization           | {0.0, 0.1}            |
|              | Embedding size              | {128, 256}            |
|              | Num of layer                | {2, 4}                |
|              | Attention head              | {4, 8}                |
|              | Dropout                     | {0.0, 0.1}            |
| Num of epoch | {50, 100, 300}              |                       |
| GraphNET     | Batch size                  | {32, 64}              |
|              | Learning rate               | {0.001, 0.01}         |
|              | L2 regularization           | {0.0, 0.1}            |
|              | Node embedding size         | {64, 256}             |
|              | Edge embedding size         | {32, 64}              |
|              | Num of layer                | {2, 4}                |
|              | Num of Set2Set layer        | {2, 3}                |
|              | Aggregation type            | {Add, Mean, Max}      |
| Num of epoch | {30, 100, 300}              |                       |
| CMPNN        | Batch size                  | {50, 64}              |
|              | Learning rate               | {0.0001, 0.001}       |
|              | L2 regularization           | {0.0, 0.1}            |
|              | Embedding size              | {256, 300}            |
|              | Dropout                     | {0.0, 0.1}            |
|              | Num of layer                | {2, 4}                |
|              | Undirected                  | {False, True}         |
|              | Num of FFN layer            | {2, 5}                |
|              | Embedding size of FFN layer | {256, 512}            |
| Num of epoch | {30, 50}                    |                       |

**Table S9.** The summary of public benchmark for XAI-assisted Fingerprints Experiments.

| Task           | Dataset  | Compounds | Train | Test |
|----------------|----------|-----------|-------|------|
| Classification | OGB-BBBP | 1835      | 1631  | 204  |
|                | OGB-BACE | 1362      | 1210  | 152  |
|                | OGB-HIV  | 37014     | 32901 | 4113 |
| Regression     | IGC50    | 1792      | 1434  | 358  |
|                | LD50     | 7413      | 5931  | 1482 |

**Table S10.** Experiment results of XAI-assisted Fingerprints on Hepatotoxicity and Ames Mutagenicity datasets.

| Metric               | Hepatotoxicity |              | Ames Mutagenicity |              |
|----------------------|----------------|--------------|-------------------|--------------|
|                      | ACC            | %increase    | AUROC             | %increase    |
| Morgan-FP            | 0.517          | -            | 0.871             | -            |
| Morgan-FP + MACCS-FP | 0.526          | 1.74%        | 0.893             | 2.52%        |
| Morgan-FP + XAI-FP   | <b>0.548</b>   | <b>5.99%</b> | <b>0.904</b>      | <b>3.79%</b> |

**Table S11.** Hyperparameter ranges for Random Forest in XAI-assisted Experiments.

| Model         | Hyperparameters          | Range                      |
|---------------|--------------------------|----------------------------|
| Random Forest | n_estimators             | {100, 200, 500, 800, 1000} |
|               | max_depth                | {5, 6, 7, 8}               |
|               | min_samples_split        | {2, 3, 4}                  |
|               | min_samples_leaf         | {1, 3, 5}                  |
|               | min_weight_fraction_leaf | {0.0, 0.1, 0.2}            |
|               | max_leaf_nodes           | {None, 1, 5}               |

## Supplemental References

- [1]. Wu, Z., Ramsundar, B., Feinberg, E.N., Gomes, J., Geniesse, C., Pappu, A.S., Leswing, K., and Pande, V. (2018). MoleculeNet: A benchmark for molecular machine learning. *Chem. Sci.* 9, 513–530. 10.1039/c7sc02664a.
- [2]. Chen, D., Gao, K., Nguyen, D.D., Chen, X., Jiang, Y., Wei, G.W., and Pan, F. (2021). Algebraic graph-assisted bidirectional transformers for molecular property prediction. *Nat. Commun.* 12. 10.1038/s41467-021-23720-w.
- [3]. Chen, D., Zheng, J., Wei, G.W., and Pan, F. (2021). Extracting Predictive Representations from Hundreds of Millions of Molecules. *J. Phys. Chem. Lett.* 12, 10793–10801. 10.1021/acs.jpcllett.1c03058.
